# Supplementary material
Source: publisher site journal article supplement (https://www.spandidos-publications.com/6104/downloadSupplementary)
Supplement: Supplementary file 1 [file downloadSupplementary]

Table SI. Post-treatment data when patients progressed the PD-1 blockades therapy among the 89 patients with advanced non-small cell lung cancer.

| Subsequent treatment         | Total, N=89 (%) | rs2297136 genotype status |              | P- value |
|------------------------------|-----------------|---------------------------|--------------|----------|
|                              |                 | AA (N=58)                 | AG/GG (N=31) |          |
| Yes                          | 49 (55.1)       | 33 (56.9)                 | 16 (51.6)    |          |
| No                           | 29 (32.5)       | 18 (31.0)                 | 11 (35.5)    | 0.888    |
| Not available                | 11 (12.4)       | 7 (12.1)                  | 4 (12.9)     |          |
| Treatment regimens (N=49)    | 49              | AA (N=33)                 | AG/GG (N=16) |          |
| Anlotinib                    | 21 (42.9)       | 14 (42.4)                 | 7 (43.7)     | 0.930    |
| Chemotherapy                 | 13 (26.5)       | 9 (27.3)                  | 4 (25.0)     | 0.866    |
| Traditional Chinese medicine | 9 (18.4)        | 6 (18.2)                  | 3 (18.8)     | 0.962    |
| PD-1/PD-L1 related therapy   | 6 (12.2)        | 4 (12.1)                  | 2 (12.5)     | 0.649    |

PD-1, programmed death-1.
